# Supplementary material for: Real-Life Utilization of Criteria Guidelines for Diagnosis of Cardiac Sarcoidosis (CS)
Source: MDPI journal article supplement (doi:10.3390/jcm12165278), 2023-08-14
Supplement: s1 [file s1]

**Table S1: Clinical cases of cardiac sarcoidosis: presentation, diagnosis, and treatment**

| Patient<br>Age<br>Sex                   | Clinical<br>symptoms of<br>cardiac<br>involvement and<br>initial cardiac<br>workup                                                                                                                  | Diagnosis of cardiac sarcoidosis                                                                                                                                                                                                                                                                                                                                                                         | Cardiac involvement<br>following initial dx of<br>sarcoidosis | Treatment                                                                                                                                                                                                                                                                                                                                                                                             | Extra-cardiac involvement                                                                                                                                                                                      |
|-----------------------------------------|-----------------------------------------------------------------------------------------------------------------------------------------------------------------------------------------------------|----------------------------------------------------------------------------------------------------------------------------------------------------------------------------------------------------------------------------------------------------------------------------------------------------------------------------------------------------------------------------------------------------------|---------------------------------------------------------------|-------------------------------------------------------------------------------------------------------------------------------------------------------------------------------------------------------------------------------------------------------------------------------------------------------------------------------------------------------------------------------------------------------|----------------------------------------------------------------------------------------------------------------------------------------------------------------------------------------------------------------|
| Case 1<br><b>Probable CS</b><br>71<br>F | Pericarditis<br>LAHB+CRBBB on<br>ECG                                                                                                                                                                | <ul style="list-style-type: none"> <li>- CMR with focal LGE in basal-antero-septal wall with less than 1% myocardial involvement and circular LGE of pericardium.</li> <li>- Cardiac PET-FDG without cardiac uptake.</li> <li>- Normal ACE level, elevated CRP level.</li> </ul>                                                                                                                         | 2 years                                                       | <ul style="list-style-type: none"> <li>- Colchicine, high dose ASA and</li> <li>- Prednisone taper from 30 mg/day</li> </ul>                                                                                                                                                                                                                                                                          | <b>RETICULOENDOTHELIAL:</b> hilar LAD with uptake on PET-FDG with NCSs on EBUS-guided biopsy<br><b>LUNG:</b> Pulmonary nodules, bronchiectasis<br><b>MSK:</b> Arthritis, diffuse skeletal uptake on PET-FDG    |
| Case 2<br><b>Presumed CS</b><br>54<br>F | Syncope and DOE<br>CAVB on ECG +<br>WCT on monitor                                                                                                                                                  | <ul style="list-style-type: none"> <li>- CMR with LGE in mid-wall basal septum, less than 1% uptake</li> <li>- Only T1 signal seen without T2 signal, suggesting old granulomatous inflammatory damage</li> <li>- Total body PET-FDG without cardiac uptake</li> <li>- Normal ACE level, normal CRP level.</li> </ul>                                                                                    | Initial<br>presentation                                       | -PM insertion                                                                                                                                                                                                                                                                                                                                                                                         | <b>ISOLATED CARDIAC</b><br>Dx following COVID-19                                                                                                                                                               |
| Case 3<br><b>Probable CS</b><br>41<br>M | -DOE with<br>bradycardia<br>due to CAVB on<br>ECG a<br>month following<br>NSTEMI and cCTA<br>+<br>stent<br>-2 years later, DOE<br>with troponin<br>elevation c/w<br>myocarditis with<br>normal cCTA | <ul style="list-style-type: none"> <li>- CMR with mild basal septal thickening, focal transmural LGE in basal apical segment with mild decrease in global systolic function in RV</li> <li>- Cardiac PM interrogation showing episodes of asymptomatic asystole 2 years later with TTE with EF=25% with global dyskinesia</li> <li>- Normal ACE level, elevated troponin, elevated CRP level.</li> </ul> | Initial<br>presentation                                       | <ul style="list-style-type: none"> <li>- Initial PM insertion</li> <li>- Prednisone taper from 60 mg/day and MTX 20 mg/week with subsequent d/c by patient and loss to follow-up</li> <li>- 2 years later: PM replaced by ICD due to suspected CS</li> <li>- Pulse IV steroids + prednisone taper from 60 mg/day + MTX 15 mg/week which was switched to AZA 150 mg/day due to side effects</li> </ul> | <b>RETICULOENDOTHELIAL:</b> Mediastinal LAD on CT with NCGs on EBUS-guided biopsy<br><b>NEUROLOGIC:</b> Peripheral nerve B/L drop foot                                                                         |
| Case 4<br><b>Probable CS</b><br>62<br>F | Generalized<br>weakness due to<br>bradycardia<br>CLBBB +2:1 AVB on<br>ECG + PMVT on<br>monitor                                                                                                      | <ul style="list-style-type: none"> <li>- TTE with diastolic dysfunction + asynchrony of septum c/w CLBBB</li> <li>- CMR with increased signal on T1 mapping (fibrosis) in apical septum c/w fibrosis, unable to complete Gadolinium injection to check for LGE due to SOB.</li> </ul>                                                                                                                    | 12 years                                                      | <ul style="list-style-type: none"> <li>- Short prednisone taper</li> <li>- ICD insertion when presenting with suspected cardiac involvement</li> </ul>                                                                                                                                                                                                                                                | <b>RETICULOENDOTHELIAL:</b> Generalized LAD on CT with NCGs on EBUS-guided biopsy, splenomegaly<br><b>LUNG:</b> Pulmonary nodules with uptake on PET-FDG, bronchiectasis<br><b>LIVER:</b> NCGs on liver biopsy |

|                                         |                                                                                                                                                  |                                                                                                                                                                                                                                                                                                                                                                                                                                                                                                |                                                                                                           |                                                                                                                                                                                                                        |                                                                                                                                                                                                                    |
|-----------------------------------------|--------------------------------------------------------------------------------------------------------------------------------------------------|------------------------------------------------------------------------------------------------------------------------------------------------------------------------------------------------------------------------------------------------------------------------------------------------------------------------------------------------------------------------------------------------------------------------------------------------------------------------------------------------|-----------------------------------------------------------------------------------------------------------|------------------------------------------------------------------------------------------------------------------------------------------------------------------------------------------------------------------------|--------------------------------------------------------------------------------------------------------------------------------------------------------------------------------------------------------------------|
|                                         |                                                                                                                                                  | <ul style="list-style-type: none"> <li>- Cardiac PET-FDG without myocardial uptake.</li> <li>- Normal ACE level around diagnosis of CS, was chronically elevated up to 95 prior to CS, normal CRP level.</li> </ul>                                                                                                                                                                                                                                                                            |                                                                                                           |                                                                                                                                                                                                                        | <b>HEMATOLOGIC:</b> bone marrow biopsy showing NCGs.                                                                                                                                                               |
| Case 5<br><b>Presumed CS</b><br>47<br>F | DOE and weakness due to bradycardia CAVB on ECG                                                                                                  | <ul style="list-style-type: none"> <li>- CMR with mild LGE in infero-septal (basal) wall involving 1% of myocardium with right atrial enlargement.</li> <li>- Cardiac PET-FDG with poor preparation-non indicative of activity.</li> <li>- Normal ACE level, normal CRP level</li> </ul>                                                                                                                                                                                                       | Initial presentation                                                                                      | <ul style="list-style-type: none"> <li>- Prednisone taper from 60 mg/day+ MTX 10 mg/week</li> <li>- ICD insertion</li> <li>- Loss to follow-up.</li> </ul>                                                             | <b>ISOLATED CARDIAC</b>                                                                                                                                                                                            |
| Case 6<br><b>Probable CS</b><br>61<br>F | DOE and weakness 2/2 bradycardia Small pericardial effusion CAVB on ECG Normal coronary CT                                                       | <ul style="list-style-type: none"> <li>- CMR with LGE in basal septum, no T1 or T2 signal, suggesting old granulomatous inflammatory damage</li> <li>- Total body PET-FDG with no cardiac uptake.</li> <li>- Normal ACE level, elevated CRP level.</li> </ul>                                                                                                                                                                                                                                  | Initial presentation                                                                                      | <ul style="list-style-type: none"> <li>- Prednisone taper from 40 mg/day + MTX</li> <li>- ICD insertion</li> <li>- Loss to follow-up.</li> </ul>                                                                       | <b>RETICULOENDOTHELIAL:</b> Mediastinal LAD with abnormal uptake on PET-FDG with NCGs on EBUS-guided biopsy<br><b>LUNG:</b> pleural effusion and GGO in lower lobes<br><b>LIVER:</b> focal liver uptake on PET-FDG |
| Case 7<br><b>Presumed CS</b><br>56<br>M | DOE, weakness and syncope Alternating CRBBB, CLBBB and PR prolongation on monitor, CAVB on ECG. Mild troponin elevation with normal coronary CT. | <ul style="list-style-type: none"> <li>- CMR with hypokinesis of apex and lateral wall, septal thickening. Positive T1 signal (interstitial fibrosis) and T2 signal (myocardial edema) with epicardial LGE in antero-septal wall and in lateral wall with 8% myocardial involvement.</li> <li>- Cardiac PET-FDG with elevated physiologic uptake in myocardium without ability to discern pathologic uptake</li> <li>- Normal ACE level, mild troponin elevation, normal CRP level.</li> </ul> | Initial presentation                                                                                      | <ul style="list-style-type: none"> <li>- Prednisone taper from 40 mg/day + plan to add MTX by provider</li> <li>- ICD insertion</li> </ul>                                                                             | <b>ISOLATED CARDIAC</b>                                                                                                                                                                                            |
| Case 8<br><b>Probable CS</b><br>40<br>F | Intermittent CP with DOE, palpitations. Normal TTE.                                                                                              | <ul style="list-style-type: none"> <li>- CMR with LGE in mid-wall of basal septum with 1% myocardial involvement.</li> <li>- Cardiac PET-FDG with perihilar LAD without uptake, cardiac apical uptake, no septal uptake.</li> <li>- Normal ACE level, elevated CRP level.</li> </ul>                                                                                                                                                                                                           | Initial presentation                                                                                      | <ul style="list-style-type: none"> <li>- Prednisone taper from 40 mg/day + HCQ for joints</li> <li>- Switched to MTX+SSZ with continuation of low dose prednisone for joints</li> </ul>                                | <b>RETICULOENDOTHELIAL:</b> Mediastinal LAD on CT with NCGs on EBUS-guided biopsy<br><b>LUNG:</b> Pulmonary nodules<br><b>MSK:</b> Arthritis<br>-Crohn's disease dx a few months following sarcoidosis             |
| Case 9<br><b>Probable CS</b><br>56<br>M | Intermittent CP with SOB, palpitations, signs and symptoms of heart failure with pulmonary edema. TTE with narrow complex                        | <ul style="list-style-type: none"> <li>- CMR with severely reduced LVEF with mild-mod reduction in RV function, LGE in mid-wall of basal septum, c/w dilated non-ischemic CMP.</li> <li>- Cardiac PET-FDG without uptake</li> <li>- Previous CMR (2 years prior) with mild lateral wall hypokinesis, LGE in lateral</li> </ul>                                                                                                                                                                 | 2-4 years following initial diagnosis (dx 4 years following initial dx but suspicion arose 2 years prior) | <ul style="list-style-type: none"> <li>- Prednisone taper from 15 mg/day + MTX 20 mg/week on dx, followed by Depo Medrol pulse IV 1 g X 3 days and AZA for a short time replaced by MMF up to 2 g/day (dose</li> </ul> | <b>RETICULOENDOTHELIAL:</b> Perihilar and mediastinal LAD on CT with NCGs on EBUS-guided biopsy<br><b>LUNG:</b> Interstitial changes and GGO<br><b>MSK:</b> Muscle biopsy with NCGs                                |

|                                          |                                                                                                                                             |                                                                                                                                                                                                                                                                                                                                                                                                                                                                                                  |                        |                                                                                                                                                                                                                                                                                                                                                                      |                                                                                                                                                                                                                                                                                                                           |
|------------------------------------------|---------------------------------------------------------------------------------------------------------------------------------------------|--------------------------------------------------------------------------------------------------------------------------------------------------------------------------------------------------------------------------------------------------------------------------------------------------------------------------------------------------------------------------------------------------------------------------------------------------------------------------------------------------|------------------------|----------------------------------------------------------------------------------------------------------------------------------------------------------------------------------------------------------------------------------------------------------------------------------------------------------------------------------------------------------------------|---------------------------------------------------------------------------------------------------------------------------------------------------------------------------------------------------------------------------------------------------------------------------------------------------------------------------|
|                                          | tachycardia, EF=25%, LVEDD 61 mm (enlarged) with mild-mod MR (prior TTE with normal LVEF=60%). Repeat ECG with NSR with PRWP and with LAHB. | <p>wall with 6% cardiac myocardial involvement- attributed at the time to AMI though cCTA with no significant cardiac lesions.</p> <ul style="list-style-type: none"> <li>- Normal ACE level around CS dx, elevated only once to 148 prior (normal &lt;70), Troponin elevation to 300, pro-BNP elevation&gt;3000, elevated CRP level.</li> </ul>                                                                                                                                                 |                        | <p>lowered to 1.5 g/day d/t hypogammaglobulinemia)</p> <ul style="list-style-type: none"> <li>- ICD inserted due to heart failure and NSVT, SVT noted on ICD interrogation</li> </ul>                                                                                                                                                                                |                                                                                                                                                                                                                                                                                                                           |
| Case 10<br><b>Probable CS</b><br>69<br>M | Hospitalization for syncope with asystole for 4-5 sec. Follow-up ECG with tri-fascicular block. AF developed later during follow-up.        | <ul style="list-style-type: none"> <li>- TTE with widened IVS 1.3 (normal until 1.1).</li> <li>- CMR with suspected LGE in focal infero-septal-mid basal septum with septal thickening.</li> <li>- Cardiac PET-FDG with pathologic cardiac septal and apical uptake.</li> <li>- Repeat PET-FDG 6 months later without cardiac uptake after initiation of immunosuppression, perihilar and mediastinal lymph node uptake still present.</li> <li>- Normal ACE level, normal CRP level.</li> </ul> | 1.5 years following dx | <ul style="list-style-type: none"> <li>- Prednisone taper on dx followed by MTX up to 20 mg/week</li> <li>- PM insertion</li> <li>- Chemotherapy for NHL (included RTX and Depo Medrol) following dx of sarcoidosis.</li> <li>- Prednisone later restarted with MMF 2 g/day following cardiac PET-FDG with dx of CS.</li> <li>- Underwent ablation for AF</li> </ul> | <p><b>RETICULOENDOTHELIAL:</b> PET-FDG with uptake in submandibular, cervical and mediastinal lymph nodes, cervical LN biopsy with sarcoid-like NCGs</p> <p><b>EYE:</b> focal uptake in L eye orbit on PET-FDG</p> <p><b>LIVER:</b> focal liver uptake on PET-FDG</p> <p><b>SKIN:</b> L lower eyelid biopsy with NCGs</p> |
| Case 11<br><b>Probable CS</b><br>50<br>M | Worsening DOE and CP with neg cardiac cath, orthopnea                                                                                       | <ul style="list-style-type: none"> <li>- TTE with normal EF</li> <li>- CMR with low-normal cardiac function, increased T1 signal in medial septum and focal LGE in medial septum.</li> <li>- Cardiac PET-FDG with no cardiac uptake.</li> <li>- Normal ACE level, normal Pro-BNP level.</li> </ul>                                                                                                                                                                                               | 1.5 years following dx | <p>Prednisone taper from 30 mg/day with MTX 15 mg/week</p> <p>-Switched to AZA 100 mg/day for several months due to lack of efficacy, d/c due to transaminitis</p> <p>-Switched to infliximab biosimilar and later to adalimumab biosimilar due to pruritus on infliximab biosimilar</p>                                                                             | <p><b>RETICULOENDOTHELIAL:</b> hilar LAD on CT with NCGs on EBUS-guided biopsy</p> <p><b>LUNG:</b> pulmonary nodules with uptake in reticulonodular infiltrates on PET-FDG</p>                                                                                                                                            |
| Case 12<br><b>Definite CS</b><br>42<br>M | -Hospitalized for VT with SCD<br>-Cardiac cath with normal coronaries<br>-TTE with severe LV dysfunction (EF=30-35%)                        | <ul style="list-style-type: none"> <li>- EMB showing NCGs</li> <li>- CMR: LV and RV LGE and increased T1 and T2 signals, compatible with myocarditis.</li> <li>- Cardiac PET-FDG- diffuse myocardial uptake with resolution of inflammation on therapy</li> <li>- Elevated ACE level 57 U/L (normal&lt;52)</li> <li>- Elevated troponin and pro-BNP levels, normal CRP level.</li> </ul>                                                                                                         | Initial presentation   | <p>-Prednisone taper from 60 mg/day+ MTX 15 mg/week</p> <p>-ICD insertion</p>                                                                                                                                                                                                                                                                                        | <p><b>RETICULOENDOTHELIAL:</b> LAD with abnormal uptake in supra- and infra-diaphragmatic lymph nodes on PET-FDG</p> <p>Skin: Pruritus, responsive to therapy</p>                                                                                                                                                         |

|                                                             |                                                                                                                                                                                                                                                                                                                                  |                                                                                                                                                                                                                                                                                                                                                                                                                                                                                                                                                                                                      |                             |                                                                                                                                                                          |                                                                                                                                                                                                                                           |
|-------------------------------------------------------------|----------------------------------------------------------------------------------------------------------------------------------------------------------------------------------------------------------------------------------------------------------------------------------------------------------------------------------|------------------------------------------------------------------------------------------------------------------------------------------------------------------------------------------------------------------------------------------------------------------------------------------------------------------------------------------------------------------------------------------------------------------------------------------------------------------------------------------------------------------------------------------------------------------------------------------------------|-----------------------------|--------------------------------------------------------------------------------------------------------------------------------------------------------------------------|-------------------------------------------------------------------------------------------------------------------------------------------------------------------------------------------------------------------------------------------|
| <p>Case 13</p> <p><b>Probable CS</b></p> <p>51</p> <p>M</p> | <ul style="list-style-type: none"> <li>- Hospitalized for syncopal episode</li> <li>- ECG: Mobitz II/cAVB</li> <li>- EPS: Severe his-purkinje disease with intrahissian conduction block</li> <li>- TTE: mild LVH, non-obstructive systolic anterior motion of mitral chordae</li> <li>- AF appeared 8 months into Rx</li> </ul> | <ul style="list-style-type: none"> <li>- EMB showing a non-specific mononuclear infiltrate</li> <li>- CMR: LGE in the interventricular septum</li> <li>- Cardiac PET-FDG: heterogenous uptake in the LV, with dominant uptake in the septum, diffuse hypermetabolic LAD; repeat PET-FDG 5 months later showed resolution of inflammation, Rx discontinued 12 months after initiation of Rx with repeat 1-year cardiac PET-FDG again showing activity, including cardiac uptake</li> <li>- Elevated ACE level 100 U/L (normal&lt;52)</li> <li>- Normal troponin level, elevated CRP level.</li> </ul> | <p>Initial presentation</p> | <ul style="list-style-type: none"> <li>- Prednisone taper from 60 mg/day + MTX up to 20 mg/week</li> <li>- ICD insertion</li> <li>- Underwent ablation for AF</li> </ul> | <p><b>RETICULOENDOTHELIAL:</b> Mediastinal LAD on CT with NCGs on EBUS-guided biopsy</p> <p><b>MSK:</b> Arthralgia</p>                                                                                                                    |
| <p>Case 14</p> <p><b>Definite CS</b></p> <p>44</p> <p>M</p> | <ul style="list-style-type: none"> <li>-Hospitalized for CP</li> <li>-ECG: tri-fascicular block</li> <li>-Holter: 2 events of MOBITZ 1</li> <li>-TTE: asymmetric septal hypertrophy, mild RVH</li> </ul>                                                                                                                         | <ul style="list-style-type: none"> <li>- EMB showing NCGs</li> <li>- CMR: LGE in the septum, RV, inferior and posterior walls of LV</li> <li>- Cardiac PET-FDG: Increased uptake in the LV infero-apical wall and in the septum</li> <li>- Repeat cardiac PET-FDG 6 months after initiation of immunosuppression showed no active signal.</li> <li>- Normal troponin level, normal CRP level.</li> </ul>                                                                                                                                                                                             | <p>Initial presentation</p> | <ul style="list-style-type: none"> <li>-Prednisone taper from 60 mg/day + MTX 15 mg/week</li> </ul>                                                                      | <p><b>RETICULOENDOTHELIAL:</b> Supra- and infradiaphragmatic LAD with uptake on PET-FDG</p> <p><b>RENAL:</b> Hypercalciuria</p> <p><b>MSK:</b> Arthralgia</p>                                                                             |
| <p>Case 15</p> <p><b>Probable CS</b></p> <p>67</p> <p>F</p> | <ul style="list-style-type: none"> <li>-Hospitalized for DOE, peripheral edema</li> <li>-TTE: new, severely reduced LV function with moderately reduced RV function and severe PHTN</li> <li>-On monitor: many APBs</li> </ul>                                                                                                   | <ul style="list-style-type: none"> <li>- CMR: LGE and increased T2 signal in LV</li> <li>- Cardiac PET-FDG: No uptake.</li> <li>- Normal troponin level, normal CRP level.</li> </ul>                                                                                                                                                                                                                                                                                                                                                                                                                | <p>3 years</p>              | <ul style="list-style-type: none"> <li>- Prednisone taper from 60 mg/day + MTX 15 mg/week</li> <li>- ICD insertion</li> </ul>                                            | <p><b>RETICULOENDOTHELIAL:</b> LAD on CT</p> <p><b>LUNG:</b> interstitial changes on CT</p> <p><b>LIVER:</b> NCGs on liver biopsy</p> <p><b>RENAL:</b> Hypercalcemia</p> <p><b>SKIN:</b> non-specific skin rash responsive to therapy</p> |
| <p>Case 16</p> <p><b>Probable CS</b></p> <p>25</p> <p>M</p> | <ul style="list-style-type: none"> <li>-Hospitalized for dyspnea</li> <li>-ECG: normal</li> <li>-TTE: segmental wall motion abnormalities, mainly infero-septal hypokinesis at the basal and mid LV with EF 50-55%</li> </ul>                                                                                                    | <ul style="list-style-type: none"> <li>- CMR: LGE and increased T2 signal in LV; normal systolic function</li> <li>- Cardiac PET-FDG: mediastinal and hilar LAD, lung infiltrates; no signs of cardiac disease; bilateral hypermetabolic pleural uptake</li> <li>- Normal troponin, elevated CRP level.</li> </ul>                                                                                                                                                                                                                                                                                   | <p>Initial presentation</p> | <ul style="list-style-type: none"> <li>-Prednisone taper from 40 mg/day+ MTX 15 mg/week</li> </ul>                                                                       | <p><b>RETICULOENDOTHELIAL:</b> Perihilar and mediastinal LAD on CT with NCGs on EBUS-guided biopsy</p> <p><b>LUNG:</b> pulmonary infiltrates</p> <p><b>RENAL:</b> Hypercalciuria</p> <p><b>MSK:</b> Arthralgia, myalgia</p>               |

|                                          |                                                                                                                                                                            |                                                                                                                                                                                                                                                                                                                                                                      |                                                                                                                                                                                                     |                                                                                           |                                                                                                                                                                                                                                                                                                                                                                                                                 |
|------------------------------------------|----------------------------------------------------------------------------------------------------------------------------------------------------------------------------|----------------------------------------------------------------------------------------------------------------------------------------------------------------------------------------------------------------------------------------------------------------------------------------------------------------------------------------------------------------------|-----------------------------------------------------------------------------------------------------------------------------------------------------------------------------------------------------|-------------------------------------------------------------------------------------------|-----------------------------------------------------------------------------------------------------------------------------------------------------------------------------------------------------------------------------------------------------------------------------------------------------------------------------------------------------------------------------------------------------------------|
| Case 17<br><b>Probable CS</b><br>52<br>M | -Hospitalized for dyspnea with transudative pleural effusion<br>-TTE: Diastolic HF, EF 50-55%<br>-ECG: sinus tachycardia<br>-EPS-PVCs                                      | - CMR: LGE and increased T2 signal in LV with normal systolic function; small pericardial effusion<br>- Cardiac PET-FDG :Non-specific septal and near-apical uptake; repeat PET-FDG 14 months following initiation of immunosuppression: resolution of inflammatory findings.<br>- Normal troponin, elevated CRP level.                                              | A few months following uveitis                                                                                                                                                                      | - Prednisone taper from 60 mg/day + MTX 15 mg/week<br>- Steroid eye gtt                   | <b>RETICULOENDOTHELIAL:</b> Increased uptake in hilar and mediastinal LAD on PET-FDG with NCGs on EBUS-guided biopsy<br><b>LUNG:</b> parenchymal involvement, small pleural effusion<br><b>EYE:</b> Left anterior uveitis<br><b>MSK:</b> diffuse uptake in lower limb muscles and soft tissues on PET-FDG, a right iliac lytic bone lesion on PET-FDG, NCGs on thigh muscle biopsy<br><b>SKIN:</b> skin nodules |
| Case 18<br><b>Probable CS</b><br>61<br>F | -Admission for syncope<br>-Mobitz type II                                                                                                                                  | -Normal ACE, normal troponin level, normal CRP level.                                                                                                                                                                                                                                                                                                                | Initial presentation, but was initially thought of as idiopathic cardiac conduction abnormality and only 6 years later was extra-cardiac involvement observed and diagnosis of sarcoidosis was made | - Cardiac PM                                                                              | <b>RETICULOENDOTHELIAL:</b> Mediastinal and hilar LAD on CT with NCGs on EBUS-guided biopsy<br><b>RENAL:</b> hypercalciuria with hypervitaminosis D                                                                                                                                                                                                                                                             |
| Case 19<br><b>Probable CS</b><br>57<br>F | -Dyspnea and palpitations, with sustained VT on ECG<br>-New-onset AF 9 months prior<br>-TTE- EF 40-44%, RV dilatation and dysfunction, LA dilatation, and mild-moderate MR | - CMR: LGE in the mid-myocardial and sub-epicardial septum and lower RV wall<br>- PET-FDG: pathologic and heterogenous myocardial uptake, including septal uptake.<br>- Repeat TTE within 14 months showed EF 45-50%<br>- Repeat PET-FDG after 14 months showed a decrease in myocardial uptake on therapy.<br>- Normal troponin and CPK levels, elevated CRP level. | Initial presentation                                                                                                                                                                                | - Prednisone 50 mg/day, tapered slowly over months<br>- MTX 15 mg/week<br>- ICD insertion | <b>RETICULOENDOTHELIAL:</b> diffuse supra- and subdiaphragmatic LAD with abnormal uptake on PET-FDG with NCGs on EBUS-guided biopsy<br><b>LUNG:</b> pulmonary infiltrates and interstitial changes<br><b>RENAL:</b> Hypercalcemia and hypercalciuria<br><b>MSK:</b> Arthralgia, jaw uptake on PET-FDG<br><b>SKIN:</b> non-specific skin rash responsive to therapy                                              |

**Abbreviations:** ACE=angiotensin converting enzyme, AF=atrial fibrillation, AMI=acute myocardial infarction, APBs=atrial premature beats, AVB=atrioventricular block (CAVB=complete AVB) , ASA=aspirin, AVNRT=atrioventricular node reentrant tachycardia, AZA=azathioprine, B/L=bilateral, cCTA=cardiac CT angiography, CLBBB, complete left bundle branch block, CMP=cardiomyopathy, CMR=cardiac magnetic resonance imaging, CP=chest pain, CRBBB=complete right bundle branch block, CRP=C-reactive protein, CS=cardiac sarcoidosis, CT=computer tomography, c/w=consistent with, d/c=discontinued, DOE=dyspnea on exertion, dx=diagnosis, EBUS=endobronchial biopsy, ECG=electrocardiogram, EF=ejection fraction, EMB=endomyocardial biopsy, EPS=electrophysiological study, F=female, , GGO=ground glass opacities, GI=gastrointestinal, HCQ=hydroxychloroquine, HF=heart failure, ICD=implantable cardioverter-defibrillator, ILD=interstitial lung disease, L=left, LAD=lymphadenopathy, LAHB=left anterior hemiblock, LGE=late gadolinium enhancement, LN=lymph nodes, LV=left ventricle, LVEDD=left ventricle end diastolic volume, M=male, MMF=mycophenolate mofetil, MR=mitral regurgitation, MSK=musculoskeletal, MTX=methotrexate, NCGs=non-caseating granulomas, NHL=non-Hodgkin's lymphoma, NSR=normal sinus rhythm, NSTEMI=non ST elevation MI, NSVT=non-sustained VT, PET-FDG=positron emission tomography using 18F-Fluorodeoxyglucose, PHTN=pulmonary hypertension, PM=pacemaker, PMVT=polymorphic VT, pro-BNP=pro-bone natriuretic peptide, PRWP=poor R wave progression, PVCs=premature ventricular contractions, RTX=rituximab, RV=right ventricle, Rx=treatment, SCD=sudden cardiac death, SOB=shortness of breath, SSZ=sulfasalazine, SVT=supraventricular tachycardia, TTE=transthoracic echocardiogram, VT=ventricular tachycardia, WCT=wide complex tachycardia

**Table S2: Clinical characteristics of cases of cardiac sarcoidosis**

|         |     |     |           | Certainty of CS diagnosis based on criteria |             |             | CS disease activity |                  |                      | Cardiac clinical presentation |    |    |     |              |             |    | Clinical biomarker elevation |     |          |     |
|---------|-----|-----|-----------|---------------------------------------------|-------------|-------------|---------------------|------------------|----------------------|-------------------------------|----|----|-----|--------------|-------------|----|------------------------------|-----|----------|-----|
| Patient | Age | Sex | Ethnicity | Definite CS                                 | Probable CS | Presumed CS | Active disease      | Inactive disease | Initial presentation | Heart block                   | AF | VT | AMI | Pericarditis | Myocarditis | HF | ACE                          | CRP | Troponin | BNP |
| Case 1  | 71  | F   | J         |                                             | 1           |             |                     | 1                |                      | 1                             |    |    |     | 1            |             |    |                              | 1   | 1        | N/A |
| Case 2  | 54  | F   | A         |                                             |             | 1           |                     | 1                | 1                    | 1                             |    | 1  |     |              |             |    |                              |     |          | N/A |
| Case 3  | 41  | M   | J         |                                             | 1           |             | 1                   |                  | 1                    | 1                             |    |    | 1   |              | 1           | 1  |                              | 1   | 1        | 1   |
| Case 4  | 62  | F   | J         |                                             | 1           |             |                     | 1                |                      | 1                             |    | 1  |     |              |             |    |                              |     |          | N/A |
| Case 5  | 47  | F   | A         |                                             |             | 1           | N/A                 | N/A              | 1                    | 1                             |    |    |     |              |             |    |                              |     |          | N/A |
| Case 6  | 61  | F   | J         |                                             | 1           |             |                     | 1                | 1                    | 1                             |    |    |     |              |             |    |                              | 1   | 1        | N/A |
| Case 7  | 56  | M   | A         |                                             |             | 1           | 1                   |                  | 1                    | 1                             |    |    |     |              | 1           |    |                              |     | 1        | N/A |
| Case 8  | 40  | F   | J         |                                             | 1           |             | 1                   |                  | 1                    |                               |    |    |     |              |             |    |                              | 1   | N/A      | N/A |

|         |    |   |   |   |   |  |   |   |   |   |   |   |  |  |   |   |     |     |     |     |
|---------|----|---|---|---|---|--|---|---|---|---|---|---|--|--|---|---|-----|-----|-----|-----|
| Case 9  | 56 | M | J |   | 1 |  |   | 1 |   | 1 |   | 1 |  |  | 1 | 1 |     | 1   | 1   | 1   |
| Case 10 | 69 | M | J |   | 1 |  | 1 |   |   | 1 | 1 |   |  |  |   |   |     | 1   | 1   |     |
| Case 11 | 50 | M | A |   | 1 |  |   | 1 |   |   |   |   |  |  |   | 1 |     | N/A | N/A |     |
| Case 12 | 42 | M | J | 1 |   |  | 1 |   | 1 |   |   | 1 |  |  | 1 | 1 | 1   |     | 1   | 1   |
| Case 13 | 51 | M | J |   | 1 |  | 1 |   | 1 | 1 | 1 |   |  |  |   |   | 1   | 1   |     | N/A |
| Case 14 | 44 | M | A | 1 |   |  | 1 |   | 1 | 1 |   |   |  |  |   |   | N/A |     |     | N/A |
| Case 15 | 67 | F | J |   | 1 |  | 1 |   |   |   |   |   |  |  |   | 1 | N/A |     |     | N/A |
| Case 16 | 25 | M | A |   | 1 |  | 1 |   | 1 |   |   |   |  |  |   | 1 | N/A | 1   |     | N/A |

|         |                             |             |                        |   |    |   |       |      |    |    |   |   |   |   |   |   |      |      |      |            |
|---------|-----------------------------|-------------|------------------------|---|----|---|-------|------|----|----|---|---|---|---|---|---|------|------|------|------------|
| Case 17 | 52                          | M           | J                      |   | 1  |   | 1     |      |    |    |   |   |   |   |   | 1 | N/A  | 1    | N/A  | N/A        |
| Case 18 | 61                          | F           | J                      |   | 1  |   | N/A   | N/A  | 1  | 1  |   |   |   |   |   |   |      |      | N/A  | N/A        |
| Case 19 | 57                          | F           | A                      |   | 1  |   | 1     |      | 1  |    | 1 | 1 |   |   |   | 1 | N/A  | 1    |      | N/A        |
| Total   | Avg Age<br>±SD<br>52.9±11.8 | F=9<br>M=10 | J=12<br>(63.2%)<br>A=7 | 2 | 14 | 3 | 11/17 | 6/17 | 12 | 12 | 3 | 5 | 1 | 1 | 4 | 8 | 2/14 | 9/18 | 7/15 | <b>4/5</b> |

**Abbreviations:** A=Arab, ACE=angiotensin converting enzyme, AF=atrial fibrillation, AMI=acute myocardial infarction, Avg=average, BNP=B-type natriuretic peptide, CRP=C-reactive protein, CS=cardiac sarcoidosis, F=female, HF=heart failure, J=Jewish, M=male, N/A=Not available, SD=standard deviation, VT=ventricular tachycardia.



Table S2a: Clinical characteristics of cases of cardiac sarcoidosis-continued

|         | Certainty of CS diagnosis based on criteria |             |             | CS disease activity |                  | Medications             |            |     |     |                         |     |     |           |                 |            | Device implantation/ Arrhythmia management |          |  |
|---------|---------------------------------------------|-------------|-------------|---------------------|------------------|-------------------------|------------|-----|-----|-------------------------|-----|-----|-----------|-----------------|------------|--------------------------------------------|----------|--|
| Patient | Definite CS                                 | Probable CS | Presumed CS | Active disease      | Inactive disease | GC                      | Colchicine | HCQ | SSZ | MTX                     | AZA | MMF | ANTI-TNFα | RTX (ANTI-CD20) | ICD        | PM                                         | Ablation |  |
| Case 1  |                                             | 1           |             |                     | 1                | 1                       | 1          |     |     |                         |     |     |           |                 |            |                                            |          |  |
| Case 2  |                                             |             | 1           |                     | 1                | Prescribed<br>Not taken |            |     |     | Prescribed<br>Not taken |     |     |           |                 |            | 1                                          |          |  |
| Case 3  |                                             | 1           |             | 1                   |                  | 1                       |            |     |     | 1                       | 1   |     |           |                 | 1 (switch) | 1                                          |          |  |
| Case 4  |                                             | 1           |             |                     | 1                | 1                       |            |     |     |                         |     |     |           |                 | 1          |                                            |          |  |
| Case 5  |                                             |             | 1           | ?                   | ?                | 1                       |            |     |     | 1                       |     |     |           |                 | 1          |                                            |          |  |
| Case 6  |                                             | 1           |             |                     | 1                | Prescribed<br>Not taken |            |     |     | Prescribed<br>Not taken |     |     |           |                 | 1          |                                            |          |  |
| Case 7  |                                             |             | 1           | 1                   |                  | 1                       |            |     |     | 1                       |     |     |           |                 | 1          |                                            |          |  |
| Case 8  |                                             | 1           |             | 1                   |                  | 1                       |            | 1   | 1   | 1                       |     |     |           |                 |            |                                            |          |  |

|         |   |   |  |   |   |   |  |  |  |   |   |   |   |   |   |   |   |
|---------|---|---|--|---|---|---|--|--|--|---|---|---|---|---|---|---|---|
| Case 9  |   | 1 |  |   | 1 | 1 |  |  |  |   |   | 1 |   |   | 1 |   |   |
| Case 10 |   | 1 |  | 1 |   | 1 |  |  |  | 1 |   | 1 |   | 1 |   | 1 | 1 |
| Case 11 |   | 1 |  |   | 1 | 1 |  |  |  | 1 | 1 |   | 1 |   |   |   |   |
| Case 12 | 1 |   |  | 1 |   | 1 |  |  |  | 1 |   |   |   |   | 1 |   |   |
| Case 13 |   | 1 |  | 1 |   | 1 |  |  |  | 1 |   |   |   |   | 1 |   | 1 |
| Case 14 | 1 |   |  | 1 |   | 1 |  |  |  | 1 |   |   |   |   | 1 |   |   |
| Case 15 |   | 1 |  | 1 |   | 1 |  |  |  | 1 |   |   |   |   |   |   |   |
| Case 16 |   | 1 |  | 1 |   | 1 |  |  |  | 1 |   |   |   |   |   |   |   |

|         |   |    |   |       |      |       |   |   |   |       |   |   |   |   |    |   |   |
|---------|---|----|---|-------|------|-------|---|---|---|-------|---|---|---|---|----|---|---|
| Case 17 |   | 1  |   | 1     |      | 1     |   |   |   | 1     |   |   |   |   |    |   |   |
| Case 18 |   | 1  |   | ?     | ?    |       |   |   |   |       |   |   |   |   |    |   |   |
| Case 19 |   | 1  |   | 1     |      | 1     |   |   |   | 1     |   |   |   |   | 1  | 1 |   |
| Total   | 2 | 14 | 3 | 11/17 | 6/17 | 16/18 | 1 | 1 | 1 | 13/15 | 2 | 2 | 1 | 1 | 10 | 4 | 2 |

**Abbreviations:** AZA=azathioprine, CS=cardiac sarcoidosis, GC=glucocorticosteroids, HCQ=hydroxychloroquine, ICD=implantable cardioverter-defibrillator, MMF=mycophenolate mofetil, MTX=methotrexate, PM=pacemaker, RTX=rituximab, SSZ=sulfasalazine
